# Supplementary material for: The promise of low-dose interleukin-2 therapy for autoimmune and inflammatory diseases
Source: Springer Nature journal article supplement (doi:10.1038/nri3823), 2015-04-17
Supplement: 41577_2015_BFnri3823_MOESM11_ESM.pdf [file 41577_2015_BFnri3823_MOESM11_ESM.pdf]

Supplementary information S1 | Main clinical and biological findings from high- to low-dose IL-2 clinical trials

| Year                                                                | Trial                                                                                                           | Disease(s)                                                                                                                                                                                                                            | N patients | Daily IL-2 dose, MIU (adjusted dose <sup>a</sup> , MIU) | IL2 administration schedule                                                              | Total IL2 (MIU) (time, days) | Main biological findings                                                                                                                                                                             | Main clinical findings                                                                                    | Refs. |
|---------------------------------------------------------------------|-----------------------------------------------------------------------------------------------------------------|---------------------------------------------------------------------------------------------------------------------------------------------------------------------------------------------------------------------------------------|------------|---------------------------------------------------------|------------------------------------------------------------------------------------------|------------------------------|------------------------------------------------------------------------------------------------------------------------------------------------------------------------------------------------------|-----------------------------------------------------------------------------------------------------------|-------|
| <b>Historical high-dose IL-2 selected clinical trials in cancer</b> |                                                                                                                 |                                                                                                                                                                                                                                       |            |                                                         |                                                                                          |                              |                                                                                                                                                                                                      |                                                                                                           |       |
| 1983                                                                | Clearance rates and systemic effects of IL-2-containing preparations                                            | Melanoma                                                                                                                                                                                                                              | 2          |                                                         | Injections of partially purified supernatant s of PHA stimulated lymphocytes             |                              | Serum half-life of 22'                                                                                                                                                                               | Severe side effects                                                                                       | 1     |
| 1985-1993                                                           | Treatment of Melanoma or RCC using high-dose bolus IL-2                                                         | Melanoma and Renal Cell Carcinoma                                                                                                                                                                                                     | 283        | 0.72/kg (50)                                            | 2 cycles of 15 IV injections administered every 8 hours; another 2 cycles for responders | Up to <b>3000</b>            |                                                                                                                                                                                                      | High Toxicity; complete response in 7% of RCC and 7% of melanoma patients                                 | 2     |
| 1991-2003                                                           | Randomized study of high-dose and low-dose IL-2 in patients with RCC                                            | Renal Cell Carcinoma                                                                                                                                                                                                                  | 306        | 0.072/kg or 0.72/kg (5 and 50)                          | 3 injections per day IV, until MTD or 15 injections                                      | <b>133</b> and <b>602</b>    |                                                                                                                                                                                                      | Toxicity markedly reduced at lower doses; Higher and more durable responses at higher doses               | 3     |
| <b>Low-dose IL-2 in autoimmune diseases</b>                         |                                                                                                                 |                                                                                                                                                                                                                                       |            |                                                         |                                                                                          |                              |                                                                                                                                                                                                      |                                                                                                           |       |
| 2007-2010                                                           | Evaluation of clinical efficacy and immunologic responses after IL-2 therapy in HCV-related vasculitis patients | Hepatitis C Virus induced Vasculitis                                                                                                                                                                                                  | 10         | 1.5 then 3                                              | Four 5-day courses                                                                       | <b>52.5</b> (60)             | Increase of CD4 <sup>+</sup> Tregs (x3) and CD8 <sup>+</sup> Tregs (x8)<br>Increase of NK and cd56 bright NKs; Decrease of B cells.                                                                  | Grade 1 & 2 AEs; no vasculitis or HCV-replication flares; improvement of the vasculitis in 8/10 patients. | 4     |
| 2011-2012                                                           | Dose-effect relationship of low-dose IL-2 in type 1 diabetes                                                    | T1D                                                                                                                                                                                                                                   | 24         | 0.3, 1, 3                                               | One 5 day-course                                                                         | <b>1.5, 5, 15</b> (5)        | Dose-dependent increase of CD4 <sup>+</sup> Tregs and CD8 <sup>+</sup> Tregs; Dose dependent decrease of B cells; No effects on NK or Teffs. Imprinting of a dose-dependent regulatory-tuned milieu. | Good tolerance; Grade 1 and 2 AEs; more days with AEs in the placebo group than in any other group.       | 5,6   |
| 2013-                                                               | Dose Finding Study of IL-2 at Ultra-low Dose in Children With Recently Diagnosed Type 1 Diabetes                | T1D                                                                                                                                                                                                                                   | 24         | 0.25, 0.5, 1                                            | One 5 day-course, followed by 1 injection every 2 weeks                                  | <b>7.5, 15, 30</b> (365)     | Double blind, in progress.                                                                                                                                                                           | Good long-term tolerance on the first 18 patients treated for at least 6 months.                          | 1     |
| 2012-2013                                                           | Effects of Low-Dose Recombinant IL-2 to Promote Treg in Alopecia Areata                                         | Alopecia Aerata                                                                                                                                                                                                                       | 5          | 1.5 then 3                                              | Four 5-day courses                                                                       | <b>52.5</b> (60)             | Increase of Tregs and decrease of CD8 <sup>+</sup> Teffs in scalp biopsies during and after IL-2 treatment.                                                                                          | Regrowth of body or scalp hair in all 5 patients, of scalp hair in 4.                                     | 7     |
| 2013-                                                               | Induction of Regulatory T Cells by Low Dose IL-2 in Autoimmune and Inflammatory Diseases                        | Moderate forms of: Rheumatoid arthritis, Ankylosing spondylitis, SLE, Psoriasis, Behcet's Disease, Wegener's granulomatosis, Takayasu's disease, Crohn's Disease, Ulcerative colitis, Autoimmune hepatitis and Sclerosing cholangitis | 132        | 1                                                       | One 5 day-course, followed by 1 injection every 2 weeks                                  | <b>17.5</b> (182)            | Increase in CD4 <sup>+</sup> Tregs in all 35 patients treated so far (x2); No significant increase in Teffs, NKs or eosinophil; decrease of anti-DNA antibodies levels in SLE.                       | Clinical improvements in SLE and other diseases                                                           | 2     |
| 2014                                                                | Low-dose IL-2-therapy in one SLE patient refractory to standard therapies                                       | Severe SLE                                                                                                                                                                                                                            | 1          | 1.5 then 3                                              | Four 5-day courses                                                                       | <b>52.5</b> (60)             | Treg increase; decreased of anti-dsDNA antibody levels.                                                                                                                                              | Well tolerated; Major clinical improvement                                                                | 8     |

## SUPPLEMENTARY INFORMATION

|                                              |                                                                      |                    |    |                                              |                                                                                             |                              |                                                                                                                                                                                       |                                                                                                                  |      |
|----------------------------------------------|----------------------------------------------------------------------|--------------------|----|----------------------------------------------|---------------------------------------------------------------------------------------------|------------------------------|---------------------------------------------------------------------------------------------------------------------------------------------------------------------------------------|------------------------------------------------------------------------------------------------------------------|------|
| 2014                                         | Low-dose Interleukine-2 in active systemic lupus erythematosus.      | SLE                | 40 | 1                                            | 3 courses of daily injections every other day for 2 Weeks                                   | 21 (90)                      | Treg increase (x2); decreased of anti-dsDNA antibody levels.                                                                                                                          | Well tolerated; Major clinical improvement in 36/40 patients who showed both clinical and serological remission. | ‡    |
| <b>Low-dose IL-2 in allo-immune diseases</b> |                                                                      |                    |    |                                              |                                                                                             |                              |                                                                                                                                                                                       |                                                                                                                  |      |
| 2007-2011                                    | Ultra-Low Dose IL-2 for Refractory Chronic Graft Versus Host Disease | cGVHD              | 23 | 0.3, 1, 3/m <sup>2</sup> (0.54 to 5.4)       | Daily administration for 8 weeks, (4 weeks hiatus, follow up administration for responders) | <b>32 to 320</b> (56 to 365) | CD4 Treg increase (x8); NK cell increase (x2)<br>Asymptomatic peripheral-blood eosinophilia                                                                                           | Grade-3 and -4 AEs; 12 partial response; Tapering of corticosteroids by 60% in responders                        | 9,10 |
| 2007-2014                                    | Ultra Low-Dose IL-2 for GVHD Prophylaxis                             | Prevention of GVHD | 16 | 0.1 and 0.2/m <sup>2</sup> (0.18 to 0.36)    | 3 times per week for 6 to 12 weeks                                                          | <b>3.3 to 13</b> (42 to 84)  | Expansion of Tregs (x2); No expansion of CD8 <sup>+</sup> memory Teffs or NK cells                                                                                                    | No grade-3 and -4 GVHD; Less infections than in control group                                                    | 11   |
| <b>Low-dose IL-2 in healthy volunteers</b>   |                                                                      |                    |    |                                              |                                                                                             |                              |                                                                                                                                                                                       |                                                                                                                  |      |
| 2012-2014                                    | Ultra-low Dose IL-2 in Healthy Volunteers                            | Healthy Volunteers | 21 | 0.05, 0.1, 0.2/m <sup>2</sup> (0.09 to 0.36) | One 5 day-course                                                                            | <b>0.45 to 1.8</b> (5)       | Expansion of Helios <sup>+</sup> and Helios <sup>-</sup> Tregs; Dose dependent increase of CD56 bright NKs; Increase in serum IP10; No increase in IL2, IFNg, IL10, IL115, IL17       | Well tolerated<br>All grade-1 AEs, except for 1 grade-2 injection site reaction                                  | 12   |
| <b>Low-dose IL-2 in non-human primates</b>   |                                                                      |                    |    |                                              |                                                                                             |                              |                                                                                                                                                                                       |                                                                                                                  |      |
| 2012-2013                                    | Low-dose IL-2 in non-human primates                                  | Healthy macaques   | 7  | 0.1, 0.6, 1/m <sup>2</sup> (0.18 to 1.8)     | Daily for 28 days                                                                           | <b>5.04 to 50.4</b> (28)     | No effects at .1 and .6 MIU; At 1 MIU, Expansion of CD4 <sup>+</sup> Tregs (x15), CD8 <sup>+</sup> (x10), CD4 Teff (x5); No expansion of CD8 <sup>+</sup> memory T cells or NKs cells | No adverse events                                                                                                | 13   |

# Adjusted doses correspond to an adult of 70 kg/1.8 m<sup>2</sup>

\* NCT01862120; DK data

† NCT01988506; DK data

‡ Di Yu and Zhanguo Li, Personal communication

### References

1. Bindon, C. *et al.* Clearance rates and systemic effects of intravenously administered interleukin 2 (IL-2) containing preparations in human subjects. *Br J Cancer* **47**, 123–33 (1983).
2. Rosenberg, S. A. *et al.* Treatment of 283 consecutive patients with metastatic melanoma or renal cell cancer using high-dose bolus interleukin 2. *JAMA* **271**, 907–913 (1994).
3. Yang, J. C. *et al.* Randomized study of high-dose and low-dose interleukin-2 in patients with metastatic renal cancer. *J Clin Oncol* **21**, 3127–32 (2003).
4. Saadoun, D. *et al.* Regulatory T-cell responses to low-dose interleukin-2 in HCV-induced vasculitis. *N Engl J Med* **365**, 2067–77 (2011).
5. Hartemann, A. *et al.* Low-dose interleukin 2 in patients with type 1 diabetes: a phase 1/2 randomised, double-blind, placebo-controlled trial. *Lancet Diabetes Endocrinol* **1**, 295–305 (2013).
6. Rosenzweig, M. *et al.* Low-dose interleukin-2 fosters a dose-dependent regulatory T cell tuned milieu in T1D patients. *J. Autoimmun.* (2015). doi:10.1016/j.jaut.2015.01.001
7. Castela, E. *et al.* Effects of low-dose recombinant interleukin 2 to promote T-regulatory cells in alopecia areata. *JAMA Dermatol* **150**, 748–51 (2014).
8. Humrich, J. Y. *et al.* Rapid induction of clinical remission by low-dose interleukin-2 in a patient with refractory SLE. *Ann. Rheum. Dis.* (2015). doi:10.1136/annrheumdis-2014-206506
9. Koreth, J. *et al.* Interleukin-2 and regulatory T cells in graft-versus-host disease. *N Engl J Med* **365**, 2055–66 (2011).
10. Matsuoka, K. *et al.* Low-Dose Interleukin-2 Therapy Restores Regulatory T Cell Homeostasis in Patients with Chronic Graft-Versus-Host Disease. *Sci. Transl. Med.* **5**, 179ra43 (2013).
11. Kennedy-Nasser, A. A. *et al.* Ultra low-dose IL-2 for GVHD prophylaxis after allogeneic hematopoietic stem cell transplantation mediates expansion of regulatory T cells without diminishing antiviral and antileukemic activity. *Clin Cancer Res* **20**, 2215–25 (2014).
12. Ito, S. *et al.* Ultra-low dose interleukin-2 promotes immune-modulating function of regulatory T cells and natural killer cells in healthy volunteers. *Mol. Ther. J. Am. Soc. Gene Ther.* **22**, 1388–1395 (2014).
13. Aoyama, A. *et al.* Low-dose IL-2 for In vivo expansion of CD4<sup>+</sup> and CD8<sup>+</sup> regulatory T cells in nonhuman primates. *Am J Transpl.* **12**, 2532–7 (2012).
